# Supplementary material for: CRISPR/Cas9-mediated mutagenesis of CAROTENOID CLEAVAGE DIOXYGENASE8 in tomato provides resistance against the parasitic weed Phelipanche aegyptiaca
Source: PubMed Central journal article supplement (PMC6685993; doi:10.1038/s41598-019-47893-z), 2019-08-07
Supplement: 41598_2019_47893_MOESM1_ESM.pdf [file 41598_2019_47893_MOESM1_ESM.pdf]

Supplementary Information:

**CRISPR/Cas9-mediated mutagenesis of *CAROTENOID CLEAVAGE DIOXYGENASE 8* in tomato provides resistance against the parasitic weed *Phelipanche aegyptiaca***

Vinay Kumar Bari<sup>1</sup>, Jackline Abu Nassar<sup>1</sup>, Sally Marzouk Kheredin<sup>1</sup>, Amit Gal-On<sup>2</sup>, Mily Ron<sup>3</sup>, Anne Britt<sup>3</sup>, Daniel Steele<sup>4</sup>, John Yoder<sup>4</sup> and Radi Aly<sup>1\*</sup>

\*Correspondence (email [radi@volcani.agri.gov.il](mailto:radi@volcani.agri.gov.il))

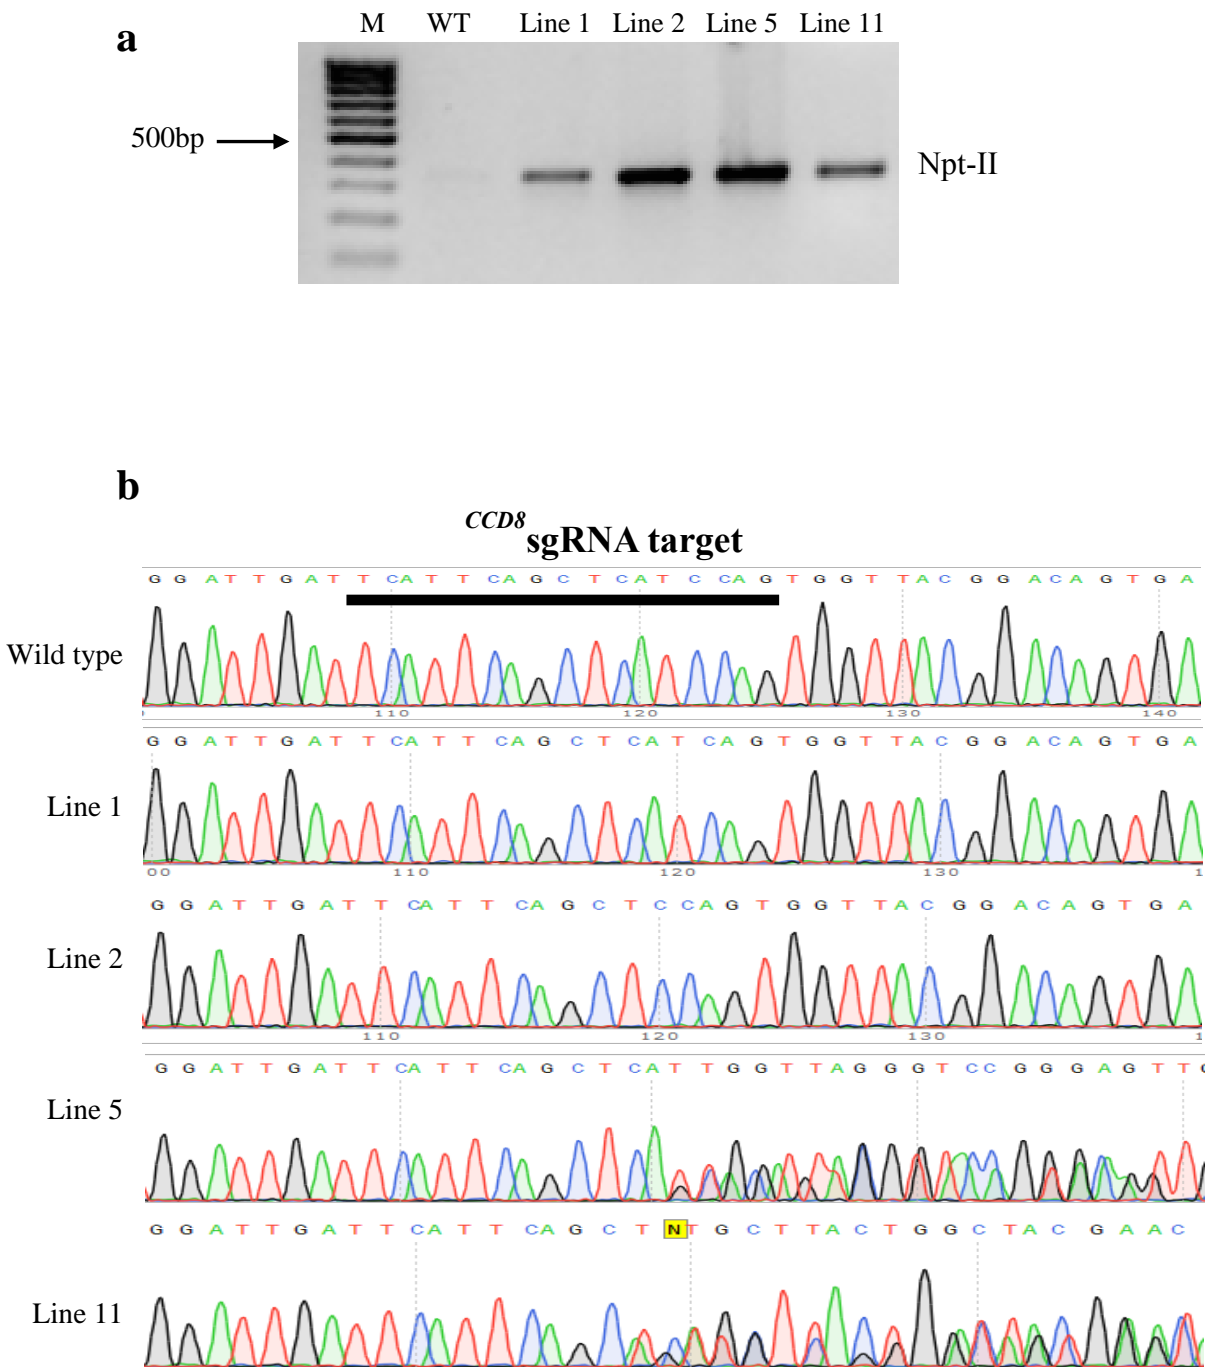

**Supplementary Fig. S1. (a)** Presence of transgene specific marker Npt-II in T0 generation of *CCD8*Cas9 edited lines. M: 100bp ladder **(b)** PCR product sequencing chromatogram of *CCD8*Cas9 edited T0 line tomato plants. Sequence underlined indicate *CCD8*sgRNA targeting sites. Wild-type sequence were used as the control.

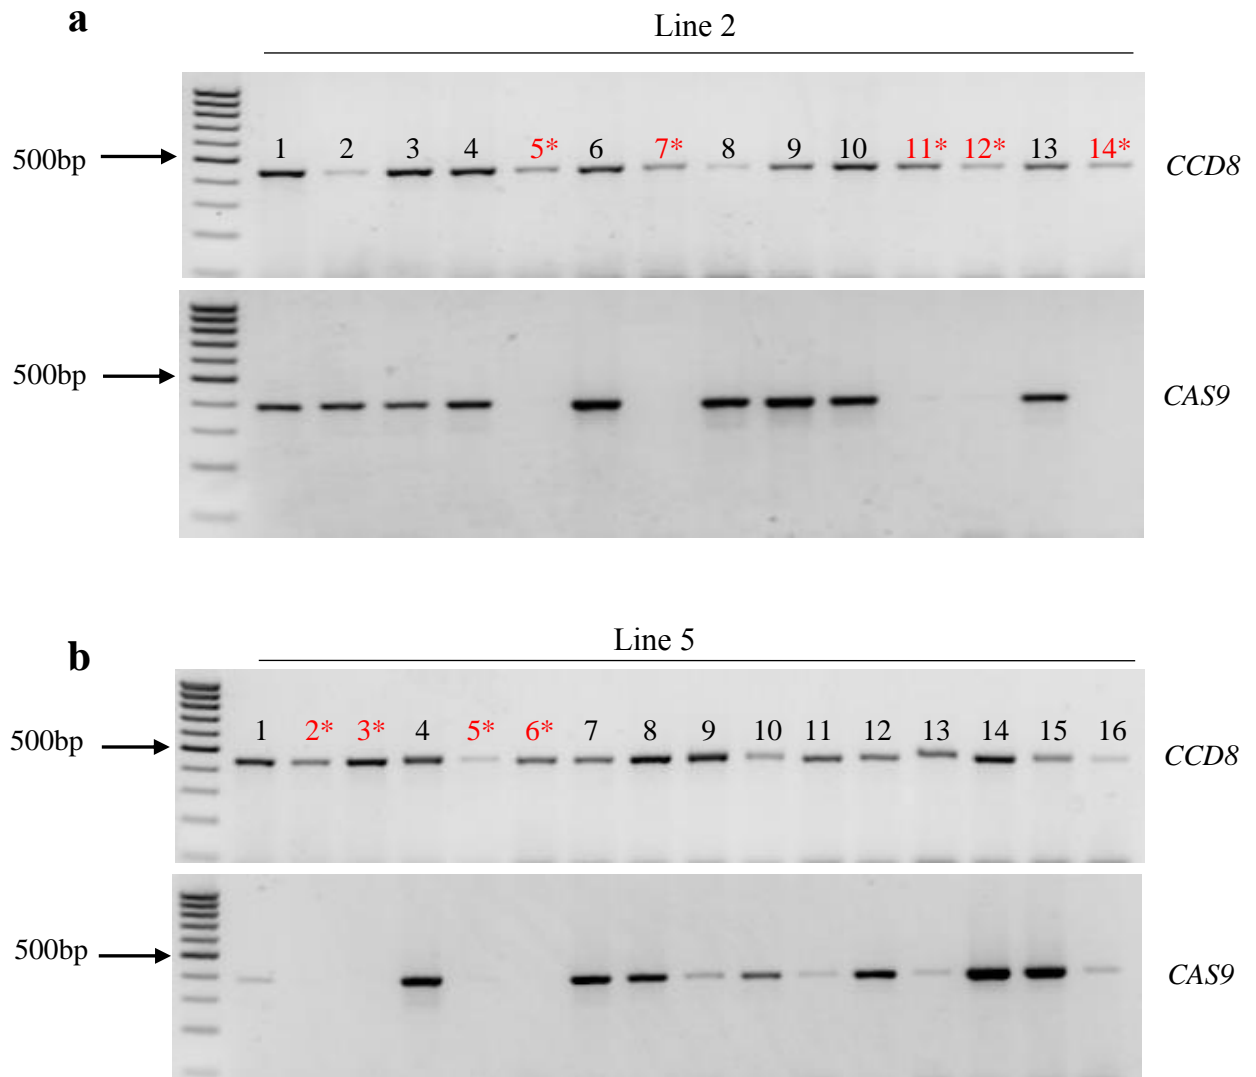

**Supplementary Fig. S2.** Identification of transgene free plants using Cas9 specific primer in T1 generation using different *CCD8* Cas9 mutants from Line 2 (a) and Line 5 (b). Red color number with asterisk denote transgene (Cas9) free plants.

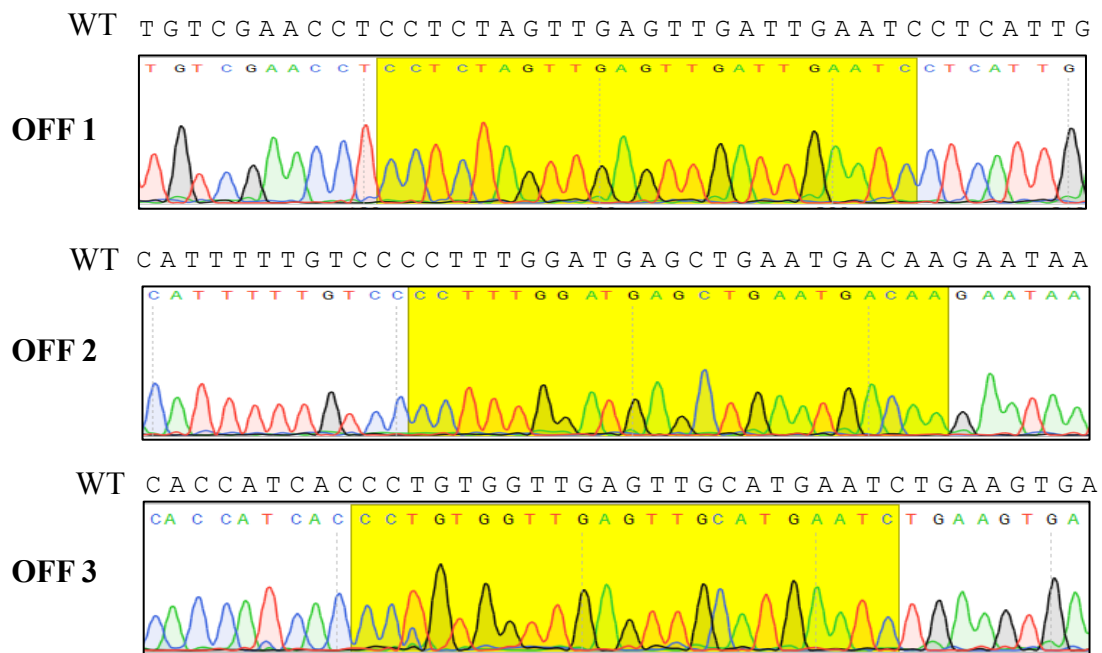

**Supplementary Fig. S3.** PCR product sequence chromatogram of potential off- target of the *CCD8*sgRNA. No off-target mutation detected in the genome of *CCD8*Cas9 edited lines. Region highlighted in yellow correspond to off target sites. For sequencing PCR product, off target specific reverse primer were used.

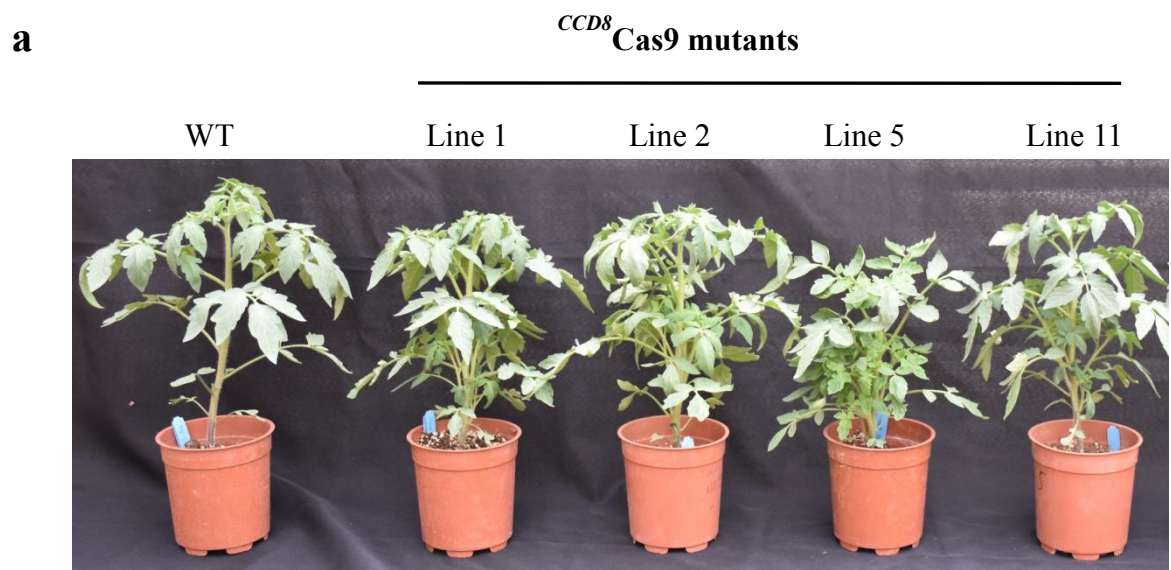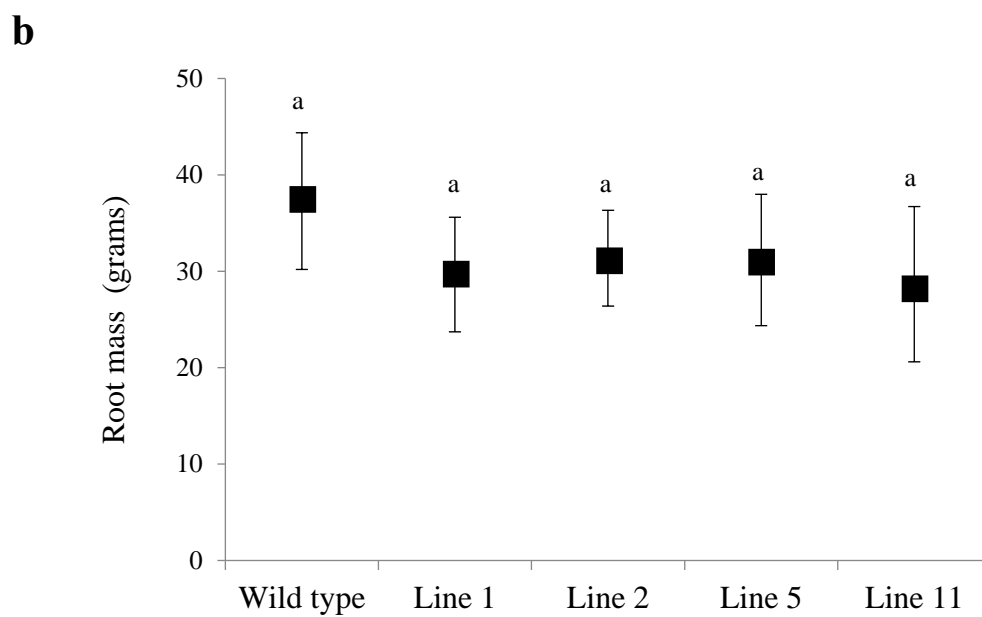

**Supplementary Fig. S4.** (a) Characteristic shoot branching phenotype of *CCD8*Cas9 knockout mutants in 1-month-old plants grown in green house. (b) Dry root mass of wild type and *CCD8*Cas9 mutant plants after 3 months of transplantation. Values are the average  $\pm$  SD (n=8). (Level connected by same letters are not significant,  $p < 0.05$ ; Student's t test).

|             |                                                  |                   |
|-------------|--------------------------------------------------|-------------------|
| S1CCD8      | TGATTCATTCAGCTCATC.CAGTGGTTACGGACAGTGAGTTCATAACG | (WT)              |
| L5a-clone 1 | TGATTCATTCAGCTCATCACAGTGGTTACGGACAGTGA           | STTCATAACG (+1bp) |
| L5a-clone 2 | TGATTCATTCAGCTCATCACAGTGGTTACGGACAGTGA           | STTCATAACG (+1bp) |
| L5a-clone 3 | TGATTCATTCAGCT.....CAGTGGTTACGGACAGTGAGTTCATA    | TAAACG (-4bp)     |
| L5a-clone 4 | TGATTCATTCAGCT.....CAGTGGTTACGGACAGTGAGTTCATA    | TAAACG (-4bp)     |
| L5a-clone 5 | TGATTCATTCAGCTCATCACAGTGGTTACGGACAGTGA           | STTCATAACG (+1bp) |
| L5a-clone 6 | TGATTCATTCAGCT.....CAGTGGTTACGGACAGTGAGTTCATA    | TAAACG (-4bp)     |
| L5a-clone 7 | TGATTCATTCAGCTCATCACAGTGGTTACGGACAGTGA           | STTCATAACG (+1bp) |
| L5a-clone 8 | TGATTCATTCAGCT.....CAGTGGTTACGGACAGTGAGTTCATA    | TAAACG (-4bp)     |

|              |                                                 |                   |
|--------------|-------------------------------------------------|-------------------|
| S1CCD8       | TGATTCATTCAGCTCATCCAGTGGTTACGGACAGTGAGTTCATAACG | (WT)              |
| L11b-clone 1 | TGATTCATTCAG.....CAGTGGTTACGGACAGTGAGTTCATAACG  | (-6bp)            |
| L11b-clone 2 | TGATTCATTCAG.....CAGTGGTTACGGACAGTGAGTTCATAACG  | (-6bp)            |
| L11b-clone 3 | TGATTCATTCAG.....CCAGTGGTTACGGACAGTGA           | STTCATAACG (-5bp) |
| L11b-clone 4 | TGATTCATTCAG.....CCAGTGGTTACGGACAGTGA           | STTCATAACG (-5bp) |
| L11b-clone 5 | TGATTCATTCAG.....CAGTGGTTACGGACAGTGAGTTCATAACG  | (-6bp)            |
| L11b-clone 6 | TGATTCATTCAG.....CCAGTGGTTACGGACAGTGA           | STTCATAACG (-5bp) |
| L11b-clone 7 | TGATTCATTCAG.....CCAGTGGTTACGGACAGTGA           | STTCATAACG (-5bp) |
| L11b-clone 8 | TGATTCATTCAG.....CAGTGGTTACGGACAGTGAGTTCATAACG  | (-6bp)            |

**Supplementary Fig. S5.** Sanger sequencing of <sup>CCD8</sup>Cas9 target region amplified from T1 generation of biallelic mutants of line 5 and 11 after cloning in pGEM-T vector, sequencing was done with M13-F Primer. Nucleotide sequence inside red box encode for stop codon.

**Supplementary Table S1.** Segregation pattern of <sup>CCD8</sup>Cas9 mediated targeted mutation from T0 to the T1 generation. The zygosity of homozygote and biallele in T0 plant lines were putative. +, Foreign DNA (Cas9) was detected; -, Foreign DNA (Cas9) was not detected.

| <sup>CCD8</sup> sgRNA/Cas9<br>Line | T0 generation |            | T1 generation                                   |                                          |                                             |
|------------------------------------|---------------|------------|-------------------------------------------------|------------------------------------------|---------------------------------------------|
|                                    | Mutation type | Zygosity   | Mutation type/<br>total test                    | Mutation exist<br>no./ total test<br>(%) | Foreign DNA<br>(Cas9)<br>segregation<br>(%) |
| Line 2                             | -3nt          | Homozygous | -3nt(14/14)                                     | 14/14 (100%)                             | 9+; 5- (35%)                                |
| Line 5                             | -4nt/+1nt     | Bi-allelic | -4nt (6/16),+1nt<br>(4/16),<br>-4nt/+1nt (6/16) | 16/16 (100%)                             | 12+; 4- (25%)                               |

**Supplementary Table S2.** Mutations analysis of potential off-target sites in *CCD8* sgRNA edited T1-lines. To analyse the off target using CRISPR-P, high score value was considered as top hit. The PAM motif (NGG) is marked by red; mismatching bases are shown in blue colour.

| Name of putative off-target sites & score | Putative off-target locus                                     | Sequence of the Putative off-target site | Number of mismatching bases | Presence of mutation detected |
|-------------------------------------------|---------------------------------------------------------------|------------------------------------------|-----------------------------|-------------------------------|
| OFF1<br>(0.511)                           | SL2.50ch05:-<br>35934063<br>Intergenic                        | GATTCAATCAACTCAACTAGAGG                  | 4                           | 0                             |
| OFF2<br>(0.341)                           | SL2.50ch07:-<br>56479727<br>Intergenic                        | TTGTCATTCAGCTCATCCAAGG                   | 4                           | 0                             |
| OFF3<br>(0.286)                           | SL2.50ch12:-<br>7245716<br>CDS<br>( <i>Solyc12g017700.1</i> ) | GATTCATGCAACTCAACCACAGG                  | 4                           | 0                             |



**Supplementary Table S3.** Orobanchol content in the roots of host plants using different <sup>CCD8</sup>Cas9 edited tomato T1-lines. Analysis of orobanchol in the root extracts was conducted by comparing retention time and mass transition with available orobanchol standards. Experiment was repeated two times, Data presented are from a typical single experiment. #ND (not determined)

| <sup>CCD8</sup> sgRNA/Cas9 edited tomato lines | Relative intensity of the chromatographic peaks area (Orobanchol content ppb) |
|------------------------------------------------|-------------------------------------------------------------------------------|
| Line 1a                                        | ND <sup>#</sup>                                                               |
| Line 1b                                        | 1.8                                                                           |
| Line 2a                                        | 3.4                                                                           |
| Line 2b                                        | ND <sup>#</sup>                                                               |
| Line 5a                                        | ND <sup>#</sup>                                                               |
| Line 5c                                        | ND <sup>#</sup>                                                               |
| Line 11a                                       | 8.9                                                                           |
| Line 11b                                       | 1.6                                                                           |
| Wild type                                      | 14.0                                                                          |

**Supplementary Table S4.** List of primers used in this study

| Oligo's name        | Sequence (5' → 3')             | Use                                                             |                      |
|---------------------|--------------------------------|-----------------------------------------------------------------|----------------------|
| <i>CCD8</i> sgRNA-F | <u>ATTGGTTCATTCAGCTCATCCAG</u> | SICCD8 Exon-2 targeting sgRNA cloning in Cas9 expression vector |                      |
| <i>CCD8</i> sgRNA-R | <u>AAACCTGGATGAGCTGAATGAA</u>  |                                                                 |                      |
| SICCD8-Int-F        | CTGGAGTCGTTAAACTTGGGGATG       | Mutation detection and sequencing                               |                      |
| SICCD8-Int-R        | GCCACTGGCTTTACACATAACATGTAC    |                                                                 |                      |
| SICCD8-qF           | CCAATTGCCTGTAATAGTTCC          | qRT-PCR                                                         |                      |
| SICCD8-qR           | GCCTTCAACGACGAGTTCTC           |                                                                 |                      |
| SIPDS1-qF           | TGATTATCCAAGACCAGAGCTG         |                                                                 |                      |
| SIPDS1-qR           | GCACCAGCAATAACAATCTCC          |                                                                 |                      |
| SILCYβ-qF           | TTGACTTAGAACCTCGTTATTGG        |                                                                 |                      |
| SILCYβ-qR           | AACAGTTCCTTTGTCATTATCTC        |                                                                 |                      |
| SIEFα1-qF           | GATTGGTGGTATTGGAAGCTGTC        |                                                                 |                      |
| SIEFα1-qR           | AGCTTCGTGGTGCATCTC             |                                                                 |                      |
| Npt-II-F            | TCTTGTCGATCAGGATGATC           |                                                                 | Transgene validation |
| Npt-II-R            | AGAAGAAGCTCGTCAAGAAG           |                                                                 |                      |
| hCas9-F             | TAAGGGTGCTAGTGCTCAGTC          |                                                                 |                      |
| hCas9-R             | CGTTTTCTCGTTATCCAAG            |                                                                 |                      |
| OFF1-5F             | AGAGAACAAGGCGAAGACAG           | off target PCR and sequencing analysis                          |                      |
| OFF1-5R             | CTTGACCAAGTGCCTCTAAC           |                                                                 |                      |
| OFF2-7F             | GGATTTTATGTTTTGAGTTAGACC       |                                                                 |                      |
| OFF2-7R             | AAAGTAACAACAAAATCCAAAG         |                                                                 |                      |
| OFF3-0F             | CCTGTTTGGGTTGATAAAAG           |                                                                 |                      |
| OFF3-0R             | TCAGGAGTAGGCTCAAATATC          |                                                                 |                      |
| M13-F               | GTTTTCCAGTCACGACG              | Sequencing of pGEM-T cloned PCR product                         |                      |
